# Supplementary material for: Hidden Giants: The Story of Bolbometopon muricatum at Ningaloo Reef
Source: MDPI journal article supplement (doi:10.3390/fishes6040073), 2021-12-06
Supplement: s1 [file s1]

**Table S1. Summary of historical scientific surveys of fish assemblages at Ningaloo Reef (1987 – 2019) AIMS = Australian Institute Marine Science, CSIRO = Commonwealth Industrial and Scientific Research Organisation, RLS = Reef Life Survey, DBCA = Department Biodiversity, Conservation and Attractions, UWA = University Western Australia**

| Custodian       | Year | Method    | Reef region | Reef_Zone  | Area/time surveyed | Reference                        |
|-----------------|------|-----------|-------------|------------|--------------------|----------------------------------|
| AIMS            | 1993 | UVC-short | Cloates     | Back reef  | 3000m2             | Depczynski <i>et al.</i> , 2015  |
| AIMS            | 1993 | UVC-short | Maud        | Back reef  | 2250m2             |                                  |
| AIMS            | 1993 | UVC-short | Osprey      | Back reef  | 3000m2             |                                  |
| AIMS            | 1993 | UVC-short | Cloates     | Reef slope | 3000m2             |                                  |
| AIMS            | 1993 | UVC-short | Osprey      | Reef slope | 3000m2             |                                  |
| AIMS            | 1998 | UVC-short | Cloates     | Back reef  | 2000m2             |                                  |
| AIMS            | 1998 | UVC-short | Mandu       | Back reef  | 2250m2             |                                  |
| AIMS            | 1998 | UVC-short | Maud        | Back reef  | 2250m2             |                                  |
| AIMS            | 1998 | UVC-short | Osprey      | Back reef  | 2250m2             |                                  |
| AIMS            | 2014 | UVC-short | Cloates     | Back reef  | 15000m2            |                                  |
| AIMS            | 2014 | UVC-short | Maud        | Back reef  | 7500m2             |                                  |
| AIMS            | 2014 | UVC-short | Pelican     | Back reef  | 7500m2             |                                  |
| AIMS            | 2014 | UVC-short | Cloates     | Lagoon     | 6000m2             |                                  |
| AIMS            | 2014 | UVC-short | Mangrove    | Lagoon     | 4500m2             |                                  |
| AIMS            | 2014 | UVC-short | Maud        | Lagoon     | 6000m2             |                                  |
| AIMS            | 2014 | UVC-short | Pelican     | Lagoon     | 7500m2             |                                  |
| AIMS            | 2014 | UVC-short | Tantabiddi  | Lagoon     | 3750m2             |                                  |
| Ayling          | 1987 | UVC-long  | Osprey      | Back reef  | 35000m2            | Ayling & Ayling, 1987            |
| Ayling          | 1987 | UVC-long  | Osprey      | Lagoon     | 25000m2            |                                  |
| Ben Fitzpatrick | 2006 | BRUV      | Mandu       | Back reef  | 1020min            | Fitzpatrick <i>et al.</i> , 2015 |
| Ben Fitzpatrick | 2006 | BRUV      | Mandu       | Back reef  | 1020min            |                                  |
| Ben Fitzpatrick | 2006 | BRUV      | Osprey      | Back reef  | 660min             |                                  |
| Ben Fitzpatrick | 2006 | BRUV      | Osprey      | Back reef  | 720min             |                                  |
| Ben Fitzpatrick | 2006 | BRUV      | Osprey      | Lagoon     | 720min             |                                  |
| Ben Fitzpatrick | 2006 | BRUV      | Mandu       | Reef Flat  | 1020min            |                                  |
| Ben Fitzpatrick | 2006 | BRUV      | Mandu       | Reef Flat  | 1080min            |                                  |
| Ben Fitzpatrick | 2006 | DOV       | Mandu       | Back reef  | 2500m2             |                                  |
| Ben Fitzpatrick | 2006 | DOV       | Mandu       | Back reef  | 2500m2             |                                  |
| Ben Fitzpatrick | 2006 | DOV       | Osprey      | Back reef  | 3750m2             |                                  |
| Ben Fitzpatrick | 2006 | DOV       | Osprey      | Back reef  | 3750m2             |                                  |
| Ben Fitzpatrick | 2006 | DOV       | Osprey      | Lagoon     | 2500m2             |                                  |
| Ben Fitzpatrick | 2006 | DOV       | Osprey      | Lagoon     | 2500m2             |                                  |
| Ben Fitzpatrick | 2006 | DOV       | Mandu       | Reef Flat  | 2500m2             |                                  |
| Ben Fitzpatrick | 2006 | DOV       | Mandu       | Reef Flat  | 2500m2             |                                  |
| Ben Fitzpatrick | 2007 | BRUV      | Mandu       | Back reef  | 1080min            |                                  |
| Ben Fitzpatrick | 2007 | BRUV      | Mandu       | Back reef  | 1080min            |                                  |

|                 |      |           |            |            |         |                                       |
|-----------------|------|-----------|------------|------------|---------|---------------------------------------|
| Ben Fitzpatrick | 2007 | BRUV      | Osprey     | Back reef  | 660min  |                                       |
| Ben Fitzpatrick | 2007 | BRUV      | Osprey     | Back reef  | 720min  |                                       |
| Ben Fitzpatrick | 2007 | BRUV      | Osprey     | Lagoon     | 600min  |                                       |
| Ben Fitzpatrick | 2007 | BRUV      | Osprey     | Lagoon     | 720min  |                                       |
| Ben Fitzpatrick | 2007 | BRUV      | Mandu      | Reef Flat  | 900min  |                                       |
| Ben Fitzpatrick | 2007 | BRUV      | Mandu      | Reef Flat  | 960min  |                                       |
| Ben Fitzpatrick | 2007 | DOV       | Mandu      | Back reef  | 2500m2  |                                       |
| Ben Fitzpatrick | 2007 | DOV       | Mandu      | Back reef  | 2500m2  |                                       |
| Ben Fitzpatrick | 2007 | DOV       | Osprey     | Back reef  | 3750m2  |                                       |
| Ben Fitzpatrick | 2007 | DOV       | Osprey     | Back reef  | 3750m2  |                                       |
| Ben Fitzpatrick | 2007 | DOV       | Osprey     | Lagoon     | 2500m2  |                                       |
| Ben Fitzpatrick | 2007 | DOV       | Osprey     | Lagoon     | 2500m2  |                                       |
| Ben Fitzpatrick | 2007 | DOV       | Mandu      | Reef Flat  | 2500m2  |                                       |
| Ben Fitzpatrick | 2007 | DOV       | Mandu      | Reef Flat  | 2500m2  |                                       |
| CSIRO           | 2006 | UVC-long  | Cloates    | Back reef  | 17000m2 | Babcock <i>et al.</i> ,<br>2008, 2018 |
| CSIRO           | 2006 | UVC-long  | Mandu      | Back reef  | 19000m2 |                                       |
| CSIRO           | 2006 | UVC-long  | Pelican    | Back reef  | 13000m2 |                                       |
| CSIRO           | 2006 | UVC-long  | Cloates    | Lagoon     | 19000m2 |                                       |
| CSIRO           | 2006 | UVC-long  | Mangrove   | Lagoon     | 10000m2 |                                       |
| CSIRO           | 2006 | UVC-long  | Mangrove   | Lagoon     | 4000m2  |                                       |
| CSIRO           | 2006 | UVC-long  | Mandu      | Reef Flat  | 32000m2 |                                       |
| CSIRO           | 2006 | UVC-long  | Mangrove   | Reef Flat  | 11000m2 |                                       |
| CSIRO           | 2006 | UVC-long  | Maud       | Reef Flat  | 5000m2  |                                       |
| CSIRO           | 2006 | UVC-long  | Osprey     | Reef Flat  | 27000m2 |                                       |
| CSIRO           | 2006 | UVC-long  | Pelican    | Reef Flat  | 9000m2  |                                       |
| CSIRO           | 2006 | UVC-long  | Lighthouse | Reef slope | 31000m2 |                                       |
| CSIRO           | 2006 | UVC-long  | Mandu      | Reef slope | 26000m2 |                                       |
| CSIRO           | 2006 | UVC-long  | Osprey     | Reef slope | 18000m2 |                                       |
| CSIRO           | 2006 | UVC-long  | Pelican    | Reef slope | 23000m2 |                                       |
| CSIRO           | 2007 | UVC-long  | Cloates    | Back reef  | 15000m2 |                                       |
| CSIRO           | 2007 | UVC-long  | Mandu      | Back reef  | 17000m2 |                                       |
| CSIRO           | 2007 | UVC-long  | Cloates    | Lagoon     | 12000m2 |                                       |
| CSIRO           | 2007 | UVC-long  | Mangrove   | Lagoon     | 8000m2  |                                       |
| CSIRO           | 2007 | UVC-long  | Mangrove   | Lagoon     | 4000m2  |                                       |
| CSIRO           | 2007 | UVC-long  | Mandu      | Reef Flat  | 37000m2 |                                       |
| CSIRO           | 2007 | UVC-long  | Mangrove   | Reef Flat  | 9000m2  |                                       |
| CSIRO           | 2007 | UVC-long  | Maud       | Reef Flat  | 10000m2 |                                       |
| CSIRO           | 2007 | UVC-long  | Osprey     | Reef Flat  | 17000m2 |                                       |
| CSIRO           | 2007 | UVC-long  | Lighthouse | Reef slope | 33000m2 |                                       |
| CSIRO           | 2007 | UVC-long  | Mandu      | Reef slope | 22000m2 |                                       |
| CSIRO           | 2007 | UVC-long  | Osprey     | Reef slope | 9000m2  |                                       |
| CSIRO           | 2007 | UVC-short | Mandu      | Reef flat  | 7200m2  |                                       |
| CSIRO           | 2007 | UVC-short | Maud       | Reef flat  | 7200m2  |                                       |
| CSIRO           | 2007 | UVC-short | Osprey     | Reef flat  | 7200m2  |                                       |

|       |      |           |          |            |         |                            |
|-------|------|-----------|----------|------------|---------|----------------------------|
| CSIRO | 2009 | UVC-short | Mandu    | Reef flat  | 6000m2  |                            |
| CSIRO | 2010 | UVC-short | Mandu    | Reef flat  | 6000m2  |                            |
| CSIRO | 2012 | UVC-short | Mandu    | Reef flat  | 6000m2  |                            |
| CSIRO | 2013 | UVC-long  | Jurabi   | Reef slope | 14000m2 | Vanderklift et al.<br>2020 |
| CSIRO | 2013 | UVC-long  | Mandu    | Reef slope | 35000m2 |                            |
| CSIRO | 2013 | UVC-long  | Osprey   | Reef slope | 30000m2 |                            |
| CSIRO | 2013 | UVC-short | Mangrove | Back reef  | 2250m2  |                            |
| CSIRO | 2013 | UVC-short | Maud     | Back reef  | 2625m2  |                            |
| CSIRO | 2013 | UVC-short | Cloates  | Reef Flat  | 6000m2  |                            |
| CSIRO | 2013 | UVC-short | Mandu    | Reef Flat  | 6000m2  |                            |
| CSIRO | 2013 | UVC-short | Mangrove | Reef Flat  | 2250m2  |                            |
| CSIRO | 2013 | UVC-short | Maud     | Reef Flat  | 3375m2  |                            |
| CSIRO | 2013 | UVC-short | Osprey   | Reef Flat  | 6000m2  |                            |
| CSIRO | 2014 | UVC-short | Mandu    | Reef Flat  | 6000m2  |                            |
| CSIRO | 2014 | UVC-short | Mandu    | Reef Flat  | 6000m2  |                            |
| CSIRO | 2014 | UVC-short | Osprey   | Reef Flat  | 6000m2  |                            |
| CSIRO | 2015 | UVC-short | Mandu    | Reef Flat  | 6000m2  |                            |
| CSIRO | 2015 | UVC-short | Mandu    | Reef Flat  | 5875m2  |                            |
| CSIRO | 2015 | UVC-long  | Jurabi   | Lagoon     | 4000m2  |                            |
| CSIRO | 2015 | UVC-long  | Mangrove | Lagoon     | 8000m2  |                            |
| CSIRO | 2015 | UVC-long  | Osprey   | Reef flat  | 4000m2  |                            |
| CSIRO | 2015 | UVC-long  | Jurabi   | Reef slope | 5000m2  |                            |
| CSIRO | 2015 | UVC-long  | Jurabi   | Reef slope | 4000m2  |                            |
| CSIRO | 2015 | UVC-long  | Osprey   | Reef slope | 13000m2 |                            |
| CSIRO | 2015 | UVC-short | Jurabi   | Lagoon     | 500m2   |                            |
| CSIRO | 2015 | UVC-short | Mangrove | Lagoon     | 1000m2  |                            |
| CSIRO | 2015 | UVC-short | Osprey   | Reef flat  | 500m2   |                            |
| CSIRO | 2015 | UVC-short | Jurabi   | Reef slope | 625m2   |                            |
| CSIRO | 2015 | UVC-short | Jurabi   | Reef slope | 500m2   |                            |
| CSIRO | 2015 | UVC-short | Osprey   | Reef slope | 1625m2  |                            |
| CSIRO | 2016 | UVC-short | Mandu    | Reef flat  | 5250m2  |                            |
| CSIRO | 2016 | UVC-short | Mandu    | Reef Flat  | 750m2   |                            |
| CSIRO | 2016 | UVC-short | Mandu    | Reef flat  | 1500m2  |                            |
| CSIRO | 2016 | UVC-long  | Mangrove | Lagoon     | 8000m2  |                            |
| CSIRO | 2016 | UVC-long  | Osprey   | Reef flat  | 3000m2  |                            |
| CSIRO | 2016 | UVC-long  | Jurabi   | Reef slope | 5000m2  |                            |
| CSIRO | 2016 | UVC-long  | Jurabi   | Reef slope | 1000m2  |                            |
| CSIRO | 2016 | UVC-long  | Osprey   | Reef slope | 10000m2 |                            |
| CSIRO | 2016 | UVC-short | Mangrove | Lagoon     | 1000m2  |                            |
| CSIRO | 2016 | UVC-short | Osprey   | Reef flat  | 375m2   |                            |
| CSIRO | 2016 | UVC-short | Jurabi   | Reef slope | 625m2   |                            |
| CSIRO | 2016 | UVC-short | Jurabi   | Reef slope | 125m2   |                            |
| CSIRO | 2016 | UVC-short | Osprey   | Reef slope | 1250m2  |                            |
| CSIRO | 2017 | UVC-short | Mandu    | Reef flat  | 1375m2  |                            |

|       |      |           |            |            |         |                                                                                       |
|-------|------|-----------|------------|------------|---------|---------------------------------------------------------------------------------------|
| CSIRO | 2017 | UVC-short | Mandu      | Reef Flat  | 375m2   |                                                                                       |
| CSIRO | 2017 | UVC-long  | Mangrove   | Lagoon     | 8000m2  |                                                                                       |
| CSIRO | 2017 | UVC-long  | Osprey     | Reef flat  | 4000m2  |                                                                                       |
| CSIRO | 2017 | UVC-long  | Jurabi     | Reef slope | 5000m2  |                                                                                       |
| CSIRO | 2017 | UVC-long  | Jurabi     | Reef slope | 2000m2  |                                                                                       |
| CSIRO | 2017 | UVC-long  | Osprey     | Reef slope | 13000m2 |                                                                                       |
| CSIRO | 2017 | UVC-short | Mangrove   | Lagoon     | 875m2   |                                                                                       |
| CSIRO | 2017 | UVC-short | Osprey     | Reef flat  | 500m2   |                                                                                       |
| CSIRO | 2017 | UVC-short | Jurabi     | Reef slope | 625m2   |                                                                                       |
| CSIRO | 2017 | UVC-short | Jurabi     | Reef slope | 250m2   |                                                                                       |
| CSIRO | 2017 | UVC-short | Osprey     | Reef slope | 1625m2  |                                                                                       |
| CSIRO | 2018 | UVC-long  | Mangrove   | Lagoon     | 8000m2  |                                                                                       |
| CSIRO | 2018 | UVC-long  | Osprey     | Reef flat  | 4000m2  |                                                                                       |
| CSIRO | 2018 | UVC-long  | Jurabi     | Reef slope | 5000m2  |                                                                                       |
| CSIRO | 2018 | UVC-long  | Jurabi     | Reef slope | 2000m2  |                                                                                       |
| CSIRO | 2018 | UVC-long  | Osprey     | Reef slope | 13000m2 |                                                                                       |
| CSIRO | 2018 | UVC-short | Mangrove   | Lagoon     | 875m2   |                                                                                       |
| CSIRO | 2018 | UVC-short | Osprey     | Reef flat  | 500m2   |                                                                                       |
| CSIRO | 2018 | UVC-short | Jurabi     | Reef slope | 625m2   |                                                                                       |
| CSIRO | 2018 | UVC-short | Jurabi     | Reef slope | 250m2   |                                                                                       |
| CSIRO | 2018 | UVC-short | Osprey     | Reef slope | 1625m2  |                                                                                       |
| CSIRO | 2019 | UVC-long  | Mangrove   | Lagoon     | 8000m2  |                                                                                       |
| CSIRO | 2019 | UVC-long  | Osprey     | Reef flat  | 4000m2  |                                                                                       |
| CSIRO | 2019 | UVC-long  | Jurabi     | Reef slope | 5000m2  |                                                                                       |
| CSIRO | 2019 | UVC-long  | Jurabi     | Reef slope | 2000m2  |                                                                                       |
| CSIRO | 2019 | UVC-long  | Osprey     | Reef slope | 13000m2 |                                                                                       |
| CSIRO | 2019 | UVC-short | Mangrove   | Lagoon     | 875m2   |                                                                                       |
| CSIRO | 2019 | UVC-short | Osprey     | Reef flat  | 500m2   |                                                                                       |
| CSIRO | 2019 | UVC-short | Jurabi     | Reef slope | 625m2   |                                                                                       |
| CSIRO | 2019 | UVC-short | Jurabi     | Reef slope | 250m2   |                                                                                       |
| CSIRO | 2019 | UVC-short | Osprey     | Reef slope | 1625m2  |                                                                                       |
| DBCA  | 2009 | UVC-short | Mandu      | Reef flat  | 5625m2  | Wilson <i>et al.</i> , 2012; Holmes <i>et al.</i> , 2013; Wilson <i>et al.</i> , 2018 |
| DBCA  | 2010 | DOV       | Maud       | Lagoon     | 3000m2  |                                                                                       |
| DBCA  | 2010 | DOV       | Tantabiddi | Lagoon     | 3000m2  |                                                                                       |
| DBCA  | 2010 | DOV       | Lighthouse | Reef slope | 1875m2  |                                                                                       |
| DBCA  | 2010 | UVC-long  | Jurabi     | Lagoon     | 3000m2  |                                                                                       |
| DBCA  | 2010 | UVC-long  | Mandu      | Lagoon     | 3000m2  |                                                                                       |
| DBCA  | 2010 | UVC-long  | Mangrove   | Lagoon     | 3000m2  |                                                                                       |
| DBCA  | 2010 | UVC-long  | Jurabi     | Lagoon     | 3000m2  |                                                                                       |
| DBCA  | 2010 | UVC-long  | Mandu      | Lagoon     | 3000m2  |                                                                                       |
| DBCA  | 2010 | UVC-long  | Mangrove   | Lagoon     | 3000m2  |                                                                                       |
| DBCA  | 2011 | DOV       | Cloates    | Back reef  | 3000m2  |                                                                                       |

|      |      |           |              |            |         |                                                                                             |
|------|------|-----------|--------------|------------|---------|---------------------------------------------------------------------------------------------|
| DBCA | 2011 | DOV       | Mangrove     | Back reef  | 3000m2  |                                                                                             |
| DBCA | 2011 | DOV       | Maud         | Back reef  | 3000m2  |                                                                                             |
| DBCA | 2011 | DOV       | Osprey       | Back reef  | 3000m2  |                                                                                             |
| DBCA | 2011 | DOV       | Pelican      | Back reef  | 3000m2  |                                                                                             |
| DBCA | 2011 | DOV       | Mangrove     | Lagoon     | 2750m2  |                                                                                             |
| DBCA | 2011 | DOV       | Maud         | Lagoon     | 3000m2  |                                                                                             |
| DBCA | 2011 | DOV       | Tantabiddi   | Lagoon     | 3000m2  |                                                                                             |
| DBCA | 2011 | DOV       | Lighthouse   | Reef slope | 3000m2  |                                                                                             |
| DBCA | 2013 | DOV       | Mangrove     | Back reef  | 3000m2  |                                                                                             |
| DBCA | 2013 | DOV       | Tantabiddi   | Lagoon     | 3000m2  |                                                                                             |
| DBCA | 2013 | UVC-short | Cloates      | Back reef  | 2700m2  | Wilson et al.,<br>2014                                                                      |
| DBCA | 2013 | UVC-short | Mandu        | Back reef  | 4050m2  |                                                                                             |
| DBCA | 2013 | UVC-short | Mangrove     | Back reef  | 2700m2  |                                                                                             |
| DBCA | 2013 | UVC-short | Mangrove     | Back reef  | 2700m2  |                                                                                             |
| DBCA | 2013 | UVC-short | Maud         | Back reef  | 5400m2  |                                                                                             |
| DBCA | 2013 | UVC-short | Maud         | Back reef  | 5400m2  |                                                                                             |
| DBCA | 2013 | UVC-short | Pelican      | Back reef  | 5400m2  |                                                                                             |
| DBCA | 2013 | UVC-short | Pelican      | Back reef  | 5400m2  |                                                                                             |
| DBCA | 2013 | UVC-short | Cloates      | Lagoon     | 6750m2  |                                                                                             |
| DBCA | 2013 | UVC-short | Mangrove     | Lagoon     | 5400m2  |                                                                                             |
| DBCA | 2013 | UVC-short | Mangrove     | Lagoon     | 5400m2  |                                                                                             |
| DBCA | 2013 | UVC-short | Maud         | Lagoon     | 6750m2  |                                                                                             |
| DBCA | 2013 | UVC-short | Maud         | Lagoon     | 6750m2  |                                                                                             |
| DBCA | 2013 | UVC-short | Pelican      | Lagoon     | 8100m2  |                                                                                             |
| DBCA | 2013 | UVC-short | Pelican      | Lagoon     | 8100m2  |                                                                                             |
| DBCA | 2014 | DOV       | Cloates      | Back reef  | 10500m2 | Wilson <i>et al.</i> ,<br>2012; Holmes <i>et al.</i> , 2013; Wilson<br><i>et al.</i> , 2018 |
| DBCA | 2014 | DOV       | Mandu        | Back reef  | 4500m2  |                                                                                             |
| DBCA | 2014 | DOV       | Mangrove     | Back reef  | 4500m2  |                                                                                             |
| DBCA | 2014 | DOV       | Maud         | Back reef  | 6000m2  |                                                                                             |
| DBCA | 2014 | DOV       | Osprey       | Back reef  | 4500m2  |                                                                                             |
| DBCA | 2014 | DOV       | Pelican      | Back reef  | 6000m2  |                                                                                             |
| DBCA | 2014 | DOV       | Winderabandi | Back reef  | 3000m2  |                                                                                             |
| DBCA | 2014 | DOV       | Mangrove     | Lagoon     | 2750m2  |                                                                                             |
| DBCA | 2014 | DOV       | Tantabiddi   | Lagoon     | 3000m2  |                                                                                             |
| DBCA | 2014 | DOV       | Lighthouse   | Reef slope | 3000m2  |                                                                                             |
| DBCA | 2014 | UVC-short | Cloates      | Back reef  | 2700m2  | Wilson et al.,<br>2014                                                                      |
| DBCA | 2014 | UVC-short | Mandu        | Back reef  | 4050m2  |                                                                                             |
| DBCA | 2014 | UVC-short | Mangrove     | Back reef  | 2700m2  |                                                                                             |
| DBCA | 2014 | UVC-short | Mangrove     | Back reef  | 2700m2  |                                                                                             |
| DBCA | 2014 | UVC-short | Maud         | Back reef  | 5400m2  |                                                                                             |

|      |      |           |            |            |        |                                                                                       |
|------|------|-----------|------------|------------|--------|---------------------------------------------------------------------------------------|
| DBCA | 2014 | UVC-short | Maud       | Back reef  | 5400m2 |                                                                                       |
| DBCA | 2014 | UVC-short | Pelican    | Back reef  | 5400m2 |                                                                                       |
| DBCA | 2014 | UVC-short | Pelican    | Back reef  | 5400m2 |                                                                                       |
| DBCA | 2014 | UVC-short | Cloates    | Lagoon     | 6750m2 |                                                                                       |
| DBCA | 2014 | UVC-short | Mangrove   | Lagoon     | 5400m2 |                                                                                       |
| DBCA | 2014 | UVC-short | Mangrove   | Lagoon     | 5400m2 |                                                                                       |
| DBCA | 2014 | UVC-short | Maud       | Lagoon     | 6750m2 |                                                                                       |
| DBCA | 2014 | UVC-short | Maud       | Lagoon     | 6750m2 |                                                                                       |
| DBCA | 2014 | UVC-short | Pelican    | Lagoon     | 8100m2 |                                                                                       |
| DBCA | 2014 | UVC-short | Pelican    | Lagoon     | 8100m2 |                                                                                       |
| DBCA | 2015 | DOV       | Mandu      | Back reef  | 3000m2 | Wilson <i>et al.</i> , 2012; Holmes <i>et al.</i> , 2013; Wilson <i>et al.</i> , 2018 |
| DBCA | 2015 | DOV       | Maud       | Back reef  | 4500m2 |                                                                                       |
| DBCA | 2015 | DOV       | Osprey     | Back reef  | 3000m2 |                                                                                       |
| DBCA | 2015 | DOV       | Tantabiddi | Lagoon     | 3000m2 |                                                                                       |
| DBCA | 2015 | DOV       | Lighthouse | Reef slope | 3000m2 |                                                                                       |
| DBCA | 2015 | UVC-short | Cloates    | Back reef  | 2700m2 | Wilson <i>et al.</i> , 2014)                                                          |
| DBCA | 2015 | UVC-short | Mandu      | Back reef  | 4050m2 |                                                                                       |
| DBCA | 2015 | UVC-short | Mangrove   | Back reef  | 2700m2 |                                                                                       |
| DBCA | 2015 | UVC-short | Mangrove   | Back reef  | 2700m2 |                                                                                       |
| DBCA | 2015 | UVC-short | Maud       | Back reef  | 5400m2 |                                                                                       |
| DBCA | 2015 | UVC-short | Maud       | Back reef  | 5400m2 |                                                                                       |
| DBCA | 2015 | UVC-short | Pelican    | Back reef  | 5400m2 |                                                                                       |
| DBCA | 2015 | UVC-short | Pelican    | Back reef  | 5400m2 |                                                                                       |
| DBCA | 2015 | UVC-short | Cloates    | Lagoon     | 6750m2 |                                                                                       |
| DBCA | 2015 | UVC-short | Mangrove   | Lagoon     | 5400m2 |                                                                                       |
| DBCA | 2015 | UVC-short | Mangrove   | Lagoon     | 5400m2 |                                                                                       |
| DBCA | 2015 | UVC-short | Maud       | Lagoon     | 6750m2 |                                                                                       |
| DBCA | 2015 | UVC-short | Maud       | Lagoon     | 6750m2 |                                                                                       |
| DBCA | 2015 | UVC-short | Pelican    | Lagoon     | 8100m2 |                                                                                       |
| DBCA | 2015 | UVC-short | Pelican    | Lagoon     | 8100m2 |                                                                                       |
| DBCA | 2016 | DOV       | Mandu      | Back reef  | 3000m2 | Wilson <i>et al.</i> , 2012; Holmes <i>et al.</i> , 2013; Wilson <i>et al.</i> , 2018 |
| DBCA | 2016 | DOV       | Mandu      | Back reef  | 3000m2 |                                                                                       |
| DBCA | 2016 | DOV       | Mangrove   | Back reef  | 3000m2 |                                                                                       |
| DBCA | 2016 | DOV       | Maud       | Back reef  | 4500m2 |                                                                                       |
| DBCA | 2016 | DOV       | Osprey     | Back reef  | 3000m2 |                                                                                       |
| DBCA | 2016 | DOV       | Osprey     | Back reef  | 3000m2 |                                                                                       |
| DBCA | 2016 | DOV       | Tantabiddi | Back reef  | 3000m2 |                                                                                       |
| DBCA | 2016 | DOV       | Tantabiddi | Lagoon     | 3000m2 |                                                                                       |

|                  |      |           |                |            |         |                                           |
|------------------|------|-----------|----------------|------------|---------|-------------------------------------------|
| DBCA             | 2016 | DOV       | Lighthouse Bay | Reef slope | 3000m2  |                                           |
| DBCA             | 2016 | UVC-long  | Mandu          | Back reef  | 3000m2  |                                           |
| DBCA             | 2016 | UVC-long  | Mangrove       | Back reef  | 3000m2  |                                           |
| DBCA             | 2016 | UVC-long  | Osprey         | Back reef  | 3000m2  |                                           |
| DBCA             | 2016 | UVC-long  | Tantabiddi     | Back reef  | 3000m2  |                                           |
| Kathy Cure       | 2013 | DOV       | Maud           | Back reef  | 13500m2 | na                                        |
| Kathy Cure       | 2013 | DOV       | Pelican        | Back reef  | 7500m2  | na                                        |
| Kathy Cure       | 2013 | DOV       | Maud           | Reef slope | 9000m2  | na                                        |
| Kathy Cure       | 2013 | DOV       | Pelican        | Reef slope | 7500m2  | na                                        |
| Mark Westera     | 1999 | UVC-short | Mandu          | Back reef  | 4000m2  | Westera 2003                              |
| Mark Westera     | 1999 | UVC-short | Maud           | Back reef  | 4000m2  |                                           |
| Mark Westera     | 1999 | UVC-short | Osprey         | Back reef  | 4250m2  |                                           |
| Mark Westera     | 2000 | BRUV      | Mandu          | Back reef  | 750min  |                                           |
| Mark Westera     | 2000 | BRUV      | Maud           | Back reef  | 690min  |                                           |
| Mark Westera     | 2000 | BRUV      | Maud           | Back reef  | 570min  |                                           |
| Mark Westera     | 2000 | UVC-long  | Mandu          | Back reef  | 20000m2 |                                           |
| Mark Westera     | 2000 | UVC-long  | Mandu          | Back reef  | 20000m2 |                                           |
| Mark Westera     | 2000 | UVC-long  | Maud           | Back reef  | 20000m2 |                                           |
| Mark Westera     | 2000 | UVC-long  | Maud           | Back reef  | 25000m2 |                                           |
| Mark Westera     | 2000 | UVC-long  | Osprey         | Back reef  | 20000m2 |                                           |
| Mark Westera     | 2000 | UVC-long  | Osprey         | Back reef  | 20000m2 |                                           |
| Mark Westera     | 2000 | UVC-short | Mandu          | Back reef  | 3750m2  |                                           |
| Mark Westera     | 2000 | UVC-short | Mandu          | Back reef  | 4000m2  |                                           |
| Mark Westera     | 2000 | UVC-short | Maud           | Back reef  | 4000m2  |                                           |
| Mark Westera     | 2000 | UVC-short | Maud           | Back reef  | 3500m2  |                                           |
| Mark Westera     | 2000 | UVC-short | Osprey         | Back reef  | 4000m2  |                                           |
| Mark Westera     | 2000 | UVC-short | Osprey         | Back reef  | 4000m2  |                                           |
| Reef Life Survey | 2010 | UVC-short | Cloates        | Back reef  | 1000m2  | Edgar GJ, and<br>Stuart-Smith, RD<br>2014 |
| Reef Life Survey | 2010 | UVC-short | Maud           | Back reef  | 4250m2  |                                           |
| Reef Life Survey | 2010 | UVC-short | Pelican        | Back reef  | 1750m2  |                                           |
| Reef Life Survey | 2012 | UVC-short | Cloates        | Back reef  | 1500m2  |                                           |
| Reef Life Survey | 2012 | UVC-short | Maud           | Back reef  | 7750m2  |                                           |
| Reef Life Survey | 2012 | UVC-short | Pelican        | Back reef  | 3000m2  |                                           |
| Reef Life Survey | 2015 | UVC-short | Cloates        | Back reef  | 1500m2  |                                           |
| Reef Life Survey | 2015 | UVC-short | Maud           | Back reef  | 11500m2 |                                           |
| Reef Life Survey | 2015 | UVC-short | Pelican        | Back reef  | 4000m2  |                                           |
| Reef Life Survey | 2016 | UVC-short | Cloates        | Back reef  | 1500m2  |                                           |
| Reef Life Survey | 2016 | UVC-short | Maud           | Back reef  | 7500m2  |                                           |
| Reef Life Survey | 2016 | UVC-short | Pelican        | Back reef  | 1500m2  |                                           |
| Reef Life Survey | 2017 | UVC-short | Cloates        | Back reef  | 1500m2  |                                           |
| Reef Life Survey | 2017 | UVC-short | Maud           | Back reef  | 8000m2  |                                           |
| Reef Life Survey | 2017 | UVC-short | Pelican        | Back reef  | 1500m2  |                                           |

|     |      |      |              |            |         |                                |
|-----|------|------|--------------|------------|---------|--------------------------------|
| UWA | 2014 | BRUV | Cloates      | Reef slope | 1500min | McLean <i>et al.</i> ,<br>2016 |
| UWA | 2014 | BRUV | Cloates      | Reef slope | 1500min |                                |
| UWA | 2014 | BRUV | Lighthouse   | Reef slope | 1200min |                                |
| UWA | 2014 | BRUV | Lighthouse   | Reef slope | 1200min |                                |
| UWA | 2014 | BRUV | Mandu        | Reef slope | 960min  |                                |
| UWA | 2014 | BRUV | Mandu        | Reef slope | 960min  |                                |
| UWA | 2014 | BRUV | Osprey       | Reef slope | 900min  |                                |
| UWA | 2014 | BRUV | Osprey       | Reef slope | 900min  |                                |
| UWA | 2014 | BRUV | Pelican      | Reef slope | 1140min |                                |
| UWA | 2014 | BRUV | Pelican      | Reef slope | 1140min |                                |
| UWA | 2014 | BRUV | Winderabandi | Reef slope | 1140min |                                |
| UWA | 2014 | BRUV | Winderabandi | Reef slope | 1140min |                                |
| UWA | 2015 | BRUV | Cloates      | Back reef  | 2400min |                                |
| UWA | 2015 | BRUV | Cloates      | Back reef  | 2400min |                                |
| UWA | 2015 | BRUV | Mandu        | Back reef  | 720min  |                                |
| UWA | 2015 | BRUV | Mandu        | Back reef  | 720min  |                                |
| UWA | 2015 | BRUV | Mangrove     | Back reef  | 720min  |                                |
| UWA | 2015 | BRUV | Mangrove     | Back reef  | 720min  |                                |
| UWA | 2015 | BRUV | Osprey       | Back reef  | 900min  |                                |
| UWA | 2015 | BRUV | Osprey       | Back reef  | 900min  |                                |
| UWA | 2015 | BRUV | Pelican      | Back reef  | 600min  |                                |
| UWA | 2015 | BRUV | Pelican      | Back reef  | 600min  |                                |
| UWA | 2015 | BRUV | Winderabandi | Back reef  | 720min  |                                |
| UWA | 2015 | BRUV | Winderabandi | Back reef  | 720min  |                                |
| UWA | 2015 | BRUV | Cloates      | Reef slope | 1800min |                                |
| UWA | 2015 | BRUV | Cloates      | Reef slope | 1800min |                                |
| UWA | 2015 | BRUV | Mandu        | Reef slope | 1440min |                                |
| UWA | 2015 | BRUV | Mandu        | Reef slope | 1440min |                                |
| UWA | 2015 | BRUV | Osprey       | Reef slope | 840min  |                                |
| UWA | 2015 | BRUV | Osprey       | Reef slope | 840min  |                                |
| UWA | 2015 | BRUV | Pelican      | Reef slope | 1200min |                                |
| UWA | 2015 | BRUV | Pelican      | Reef slope | 1200min |                                |
| UWA | 2015 | BRUV | Winderabandi | Reef slope | 660min  |                                |
| UWA | 2015 | BRUV | Winderabandi | Reef slope | 660min  |                                |

## References

- Ayling, T. & Ayling, A.L. (1987) Ningaloo Marine Park: preliminary fish density assessment and habitat survey: with information on coral damage due to *Drupella cornus* grazing: a report prepared for the Department of Conservation and Land Management, Western Australia. Department of Conservation and Land Management.
- Babcock, R., Haywood, M., Vanderklift, M., Clapin, G., Kleczkowski, M., Dennis, D., Skewes, T., Milton, D., Murphy, N. & Pillans, R. (2008) Ecosystem Impacts of Human Usage and the Effectiveness of Zoning for Biodiversity conservation: Broad-scale Fish Census. Final Analysis



- and Recommendations 2007. In: Final Analysis and Recommendations, p. 99. CSIRO Marine and Atmospheric Research, Hobart.
- Depczynski, M.M., Tinkler, P.P., Cheal, A.A. & Speed, C.C. (2015) Ningaloo fish communities. Ningaloo and Outer Shark Bay Environmental Baseline Survey 2014 (ed. by K.K. Miller, M.M. Depczynski, M.M. Cappo, M.M. Wakeford, C.C. Speed, M.M. Stowar, J.J. Colquhoun, P.P. Tinkler, A.A. Cheal and R.R. Fisher), p. 121. Report prepared by the Australian Institute of Marine Science for Woodside Energy Ltd. Australian Institute of Marine Science, Townsville, Australia.
- Edgar, G.J., Stuart-Smith, R.D., Systematic global assessment of reef fish communities by the Reef Life Survey program, Scientific data, (2014)
- Fitzpatrick, B., Harvey, E., Langlois, T., Babcock, R. & Twigg, E. (2015) Effects of fishing on fish assemblages at the reefscape scale. *Marine Ecology Progress Series*, 524, 241-253.
- Fulton, C.J., Depczynski, M., Holmes, T.H., Noble, M.M., Radford, B., Wernberg, T. & Wilson, S.K. (2014) Sea temperature shapes seasonal fluctuations in seaweed biomass within the Ningaloo coral reef ecosystem. *Limnology and Oceanography*, 59, 156-166.
- Holmes, T.H., Wilson, S.K., Travers, M.J., Langlois, T.J., Evans, R.D., Moore, G.I., Douglas, R.A., Shedrawi, G., Harvey, E.S. & Hickey, K. (2013) A comparison of visual-and stereo-video based fish community assessment methods in tropical and temperate marine waters of Western Australia. *Limnology and Oceanography, Methods*, 11, 337-350.
- McLean, D.L., Langlois, T.J., Newman, S.J., Holmes, T.H., Birt, M.J., Bornt, K.R., Bond, T., Collins, D.L., Evans, S.N., Travers, M.J., Wakefield, C.B., Babcock, R.C. & Fisher, R. (2016) Distribution, abundance, diversity and habitat associations of fishes across a bioregion experiencing rapid coastal development. *Estuarine, Coastal and Shelf Science*, 178, 36-47.
- Westera, M.B. (2003) The effect of recreational fishing on targeted fishes and trophic structure, in a coral reef marine park. Edith Cowan University, Perth, Western Australia.
- Wilson, S.K., Graham, N.A.J., Holmes, T., MacNeil, M.A. & Ryan, N. (2018) Visual versus video methods for estimating reef fish biomass. *Ecological Indicators*, 85, 146-152.
- Wilson, S.K., Babcock, R.C., Fisher, R., Holmes, T.H., Moore, J.A.Y. & Thomson, D.P. (2012) Relative and combined effects of habitat and fishing on reef fish communities across a limited fishing gradient at Ningaloo. *Marine Environmental Research*, 81, 1-11.
- Wilson, S. K., C. J. Fulton, M. Depczynski, T. H. Holmes, M. M. Noble, B. Radford, and P. Tinkler. (2014) Seasonal changes in habitat structure underpin shifts in macroalgae-associated tropical fish communities. *Marine Biology* 161:2597-2607.
- Vanderklift, Mat; Babcock, Russ; Thomson, Damian; Pillans, Richard. Ningaloo Outlook Annual Report - Year 5. CSIRO: CSIRO; 2020.

**Table S2. Summary data from 2021 timed-swim surveys**

| Month    | Latitude | Longitude | Transect length (m) | Surveyed area (ha) | Number fish | Density (ind/ha) |
|----------|----------|-----------|---------------------|--------------------|-------------|------------------|
| February | -21.8578 | 113.981   | 903                 | 1.8                | 0           | 0.0              |
| February | -22.218  | 113.8331  | 789                 | 1.6                | 0           | 0.0              |
| February | -22.0093 | 113.9007  | 603                 | 1.2                | 0           | 0.0              |
| February | -22.0062 | 113.9017  | 598                 | 1.2                | 1           | 0.8              |
| February | -22.0031 | 113.9037  | 439                 | 0.9                | 0           | 0.0              |
| February | -21.9968 | 113.9063  | 545                 | 1.1                | 2           | 1.8              |
| February | -21.9732 | 113.9118  | 561                 | 1.1                | 0           | 0.0              |
| February | -21.9644 | 113.9126  | 660                 | 1.3                | 0           | 0.0              |
| February | -21.9588 | 113.9131  | 511                 | 1.0                | 0           | 0.0              |
| February | -21.9529 | 113.9144  | 388                 | 0.8                | 0           | 0.0              |
| February | -21.9465 | 113.9159  | 902                 | 1.8                | 7           | 3.9              |
| February | -21.8578 | 113.981   | 764                 | 1.5                | 0           | 0.0              |
| February | -21.8695 | 113.9718  | 818                 | 1.6                | 0           | 0.0              |
| February | -22.2478 | 113.8208  | 695                 | 1.4                | 0           | 0.0              |
| February | -22.2612 | 113.816   | 688                 | 1.4                | 0           | 0.0              |
| February | -22.2549 | 113.8182  | 627                 | 1.3                | 0           | 0.0              |
| February | -22.2283 | 113.827   | 838                 | 1.7                | 0           | 0.0              |
| February | -22.2104 | 113.8358  | 707                 | 1.4                | 0           | 0.0              |
| February | -22.0181 | 113.8976  | 609                 | 1.2                | 0           | 0.0              |
| February | -22.0263 | 113.8965  | 342                 | 0.7                | 0           | 0.0              |
| February | -22.037  | 113.8965  | 616                 | 1.2                | 0           | 0.0              |
| February | -21.9351 | 113.9187  | 848                 | 1.7                | 35          | 20.6             |
| February | -21.9247 | 113.9228  | 874                 | 1.7                | 11          | 6.3              |
| February | -21.9126 | 113.9284  | 839                 | 1.7                | 43          | 25.6             |
| February | -21.9052 | 113.9329  | 702                 | 1.4                | 0           | 0.0              |
| February | -22.0797 | 113.8829  | 810                 | 1.6                | 0           | 0.0              |
| February | -22.0696 | 113.8866  | 903                 | 1.8                | 0           | 0.0              |
| February | -22.0583 | 113.8886  | 744                 | 1.5                | 0           | 0.0              |
| February | -22.0515 | 113.8891  | 776                 | 1.6                | 0           | 0.0              |
| February | -21.9655 | 113.9176  | 660                 | 1.3                | 0           | 0.0              |
| February | -21.974  | 113.9184  | 582                 | 1.2                | 0           | 0.0              |
| May      | -21.9151 | 113.9278  | 912                 | 1.8                | 0           | 0.0              |
| May      | -22.1852 | 113.8455  | 618                 | 1.2                | 0           | 0.0              |
| May      | -22.1751 | 113.8502  | 563                 | 1.1                | 0           | 0.0              |
| May      | -22.1684 | 113.8528  | 685                 | 1.4                | 0           | 0.0              |
| May      | -22.1486 | 113.8605  | 606                 | 1.2                | 0           | 0.0              |
| May      | -21.9151 | 113.9278  | 743                 | 1.5                | 0           | 0.0              |
| May      | -21.9222 | 113.9243  | 594                 | 1.2                | 0           | 0.0              |
| May      | -21.9285 | 113.9217  | 912                 | 1.8                | 1           | 0.5              |
| May      | -22.1051 | 113.873   | 668                 | 1.3                | 0           | 0.0              |
| May      | -22.0948 | 113.8769  | 740                 | 1.5                | 0           | 0.0              |

|       |          |          |       |      |     |      |
|-------|----------|----------|-------|------|-----|------|
| May   | -22.082  | 113.8824 | 592   | 1.2  | 0   | 0.0  |
| May   | -22.0709 | 113.8871 | 724   | 1.4  | 0   | 0.0  |
| May   | -22.056  | 113.8895 | 614   | 1.2  | 0   | 0.0  |
| May   | -22.0404 | 113.8954 | 530   | 1.1  | 0   | 0.0  |
| May   | -22.0352 | 113.8966 | 466   | 0.9  | 0   | 0.0  |
| May   | -22.0276 | 113.8954 | 643   | 1.3  | 55  | 42.8 |
| May   | -22.0217 | 113.8979 | 545   | 1.1  | 0   | 0.0  |
| TOTAL |          |          | 31593 | 63.2 | 155 |      |

**Table S3. Reported sightings of *Bolbometapon muricatum* by expert witnesses between 2007 and 2020 at Ningaloo.**

| Year | Month | Day | Latitude | Longitude | Number_fish | Length (cm) | Depth (m) | Habitat    |
|------|-------|-----|----------|-----------|-------------|-------------|-----------|------------|
| 2020 | -     | -   | -23.1654 | 113.7493  | 15          | na          | -         | Reef slope |
| 2020 | -     | -   | -22.0255 | 113.8969  | 15          | na          | -         | Reef slope |
| 2020 | 10    | 8   | -23.1358 | 113.7448  | 15          | 75          | -         | Reef slope |
| 2020 | 9     | 20  | -22.4992 | 113.6932  | 10          | na          | -         | Reef flat  |
| 2020 | 10    | 5   | -23.0445 | 113.7721  | 1           | 70          | 3         | Reef flat  |
| 2020 | 9     | -   | -23.6395 | 113.6017  | 15          | 100         | 3         | Reef slope |
| 2020 | 2     | -   | -21.9519 | 113.9266  | 20          | na          | 1         | Reef flat  |
| 2020 | 9     | 8   | -21.9968 | 113.9063  | 60          | 120         | 5         | Reef slope |
| 2020 | 5     |     | -23.1729 | 113.9757  | 1           | 6 to 10     | 5         | Lagoon     |
| 2020 | 5     |     | -23.1729 | 113.9757  | 1           | 6 to 10     | 5         | Lagoon     |
| 2019 | 11    | -   | -21.9519 | 113.9266  | 20          | na          | 1         | Reef flat  |
| 2019 | 5     | -   | -21.9974 | 113.9113  | 5           | 70          | 5         | Reef slope |
| 2018 | -     | -   | -21.9778 | 113.9201  | 1           | na          | 1         | Reef flat  |
| 2018 | 8     |     | -23.1729 | 113.9757  | 1           | 15          | 5         | Lagoon     |
| 2017 | -     | -   | -22.4992 | 113.6932  | 25          | 100         | 5         | Reef slope |
| 2016 | -     | -   | -22.4992 | 113.6932  | 25          | 100         | 5         | Reef slope |
| 2016 | 5     | -   | -21.9678 | 113.9131  | 30          | 80          | 1         | Reef slope |
| 2015 | -     | -   | -22.4992 | 113.6932  | 25          | 100         | 5         | Reef slope |
| 2015 | 2     | -   | -21.9519 | 113.9266  | 20          | na          | 1         | Reef flat  |
| 2014 | -     | -   | -21.9628 | 113.9157  | 50          | 100         | 1         | Reef flat  |
| 2011 | 6     |     | -21.9105 | 113.9644  | 1           | 6           | 4         | Lagoon     |
| 2008 | -     | -   | -22.2394 | 113.8245  | 30          | 100         | 6         | Reef slope |
| 2008 | 2     | -   | -21.9974 | 113.9113  | 5           | na          | 5         | Reef slope |
| 2007 | 11    | -   | -21.9678 | 113.9131  | 30          | 100         | 1         | Reef slope |
| 2007 | 11    | -   | -21.9628 | 113.9157  | 30          | 80          | 1         | Reef slope |
| 2007 | -     | -   | -21.9105 | 113.9644  | 1           | 10          | 4         | Lagoon     |
| 2007 | -     | -   | -21.9519 | 113.9266  | 1           | 10          | 4         | Lagoon     |

**Table S4. Assessment of limiting factors on the distribution and abundance of *B. muricatum* at northern Ningaloo (Table adapted from Kobayashi et al. 2011)**

| Factor considered                                                                               | Discussion                                                                                                                                                                                                                                                                                                                                                                                                                                                 | Plausible limiting factor |
|-------------------------------------------------------------------------------------------------|------------------------------------------------------------------------------------------------------------------------------------------------------------------------------------------------------------------------------------------------------------------------------------------------------------------------------------------------------------------------------------------------------------------------------------------------------------|---------------------------|
| <b>Settlement/recruitment</b>                                                                   | It remains unclear whether any shortages of juveniles at Ningaloo reflect shortages of egg/larval supply or is indicative of bottlenecks in older life history stages. Since recruitment limitation is commonly documented in other reef fish species, this is a plausible limiting factor for this species at northern Ningaloo                                                                                                                           | Plausible                 |
| <b>Juvenile habitat</b>                                                                         | The juveniles of this species settle/recruit to shallow, low-energy, lagoonal areas within either seagrass, mangroves, or high relief coral formations. This specific habitat requirement is considered to be a plausible limiting factor to their distribution at northern Ningaloo                                                                                                                                                                       | Plausible                 |
| <b>Physical environmental constraints (temperature, salinity, oxygen, light, water clarity)</b> | This species has a wide range and is found throughout the Indo-Pacific from the Red Sea and East Africa as far eastward as the Line Islands and Samoa. The southern extremity of its range in both the Indian and Pacific oceans is approximately 21 degrees south, approximately the same latitude of northern Ningaloo Reef. Extreme environmental conditions are therefore considered a plausible limiting factor for this species at northern Ningaloo | Plausible                 |
| <b>Conspecifics</b>                                                                             | The species displays a relatively complex social behavior. It is possible that density-dependent effects could hinder initial population growth as has been shown in some reef fishes preferentially recruiting to areas with conspecifics.                                                                                                                                                                                                                | Possible                  |
| <b>Predators</b>                                                                                | The species is gregarious, grows to a large size, can maneuver adeptly around the benthos, and is likely difficult to prey upon once adult size and behavior are attained. The primary predators of adults would be large sharks, which occur in moderate to high abundance at northern Ningaloo.                                                                                                                                                          | Possible                  |
| <b>Adult daytime habitat</b>                                                                    | The species has been shown to have a large home range or territory in the high-energy environment of the forereef and adjacent areas. Space on the reef crest does not seem to be a limiting factor at northern Ningaloo.                                                                                                                                                                                                                                  | Unlikely                  |
| <b>Adult sleeping habitat</b>                                                                   | This species sleeps at night in sheltered areas of the reef, either in caves or in some instances in deeper reef passages. Adequate passages and spur/groove habitat in deeper water is likely necessary for optimal survival while sleeping, all of which are present in habitats adjacent mangrove Bay at Ningaloo.                                                                                                                                      | Unlikely                  |
| <b>Adult food</b>                                                                               | The species is a facultative corallivore and has been observed feeding on algae, sponges, and other benthic organisms. It is unlikely that food is a limiting factor.                                                                                                                                                                                                                                                                                      | Unlikely                  |
